# Supplementary material
Source: MDPI journal article supplement (https://www.mdpi.com/2311-7524/8/6/548)
Supplement: s1 [file s1]

## **Supporting Information**

**For**

### **A One-step Polyphenol Removal Approach for Detection of Multiple Phytohormones from Grape Berry**

**Xue-Chen Yao<sup>1,2</sup>, Nong-Yu Xia<sup>1,2</sup>, Xiao Meng<sup>1,2</sup>, Chang-Qing Duan<sup>1,2</sup>, Qiu-Hong Pan<sup>1,2\*</sup>**

<sup>1</sup>Center for Viticulture and Enology, College of Food Science and Nutritional Engineering,  
China Agricultural University, Beijing, China

<sup>2</sup>Key Laboratory of Viticulture and Enology, Ministry of Agricultural and Rural Affairs,  
Beijing, China

## Table of Contents:

**Figure S1:** Chemical structures of IP, GA<sub>3</sub>, SA, JA, IAA, IBA, MeIAA, MeSA, MeJA and BL as representative Phytohormones.

**Table S1.** The MRM parameters of 5 anthocyanins.

**Table S2.** The MRM parameters of non-anthocyanin phenolics.

**Table S3.** Abundance of anthocyanins and non-anthocyanin phenolics in sample solution using different elution solution.

**Table S4.** The dMRM parameters of 11 hormones and internal standard.

**Table S5.** Linearity, LODs and LOQs of IAA and IBA in dMRM mode.

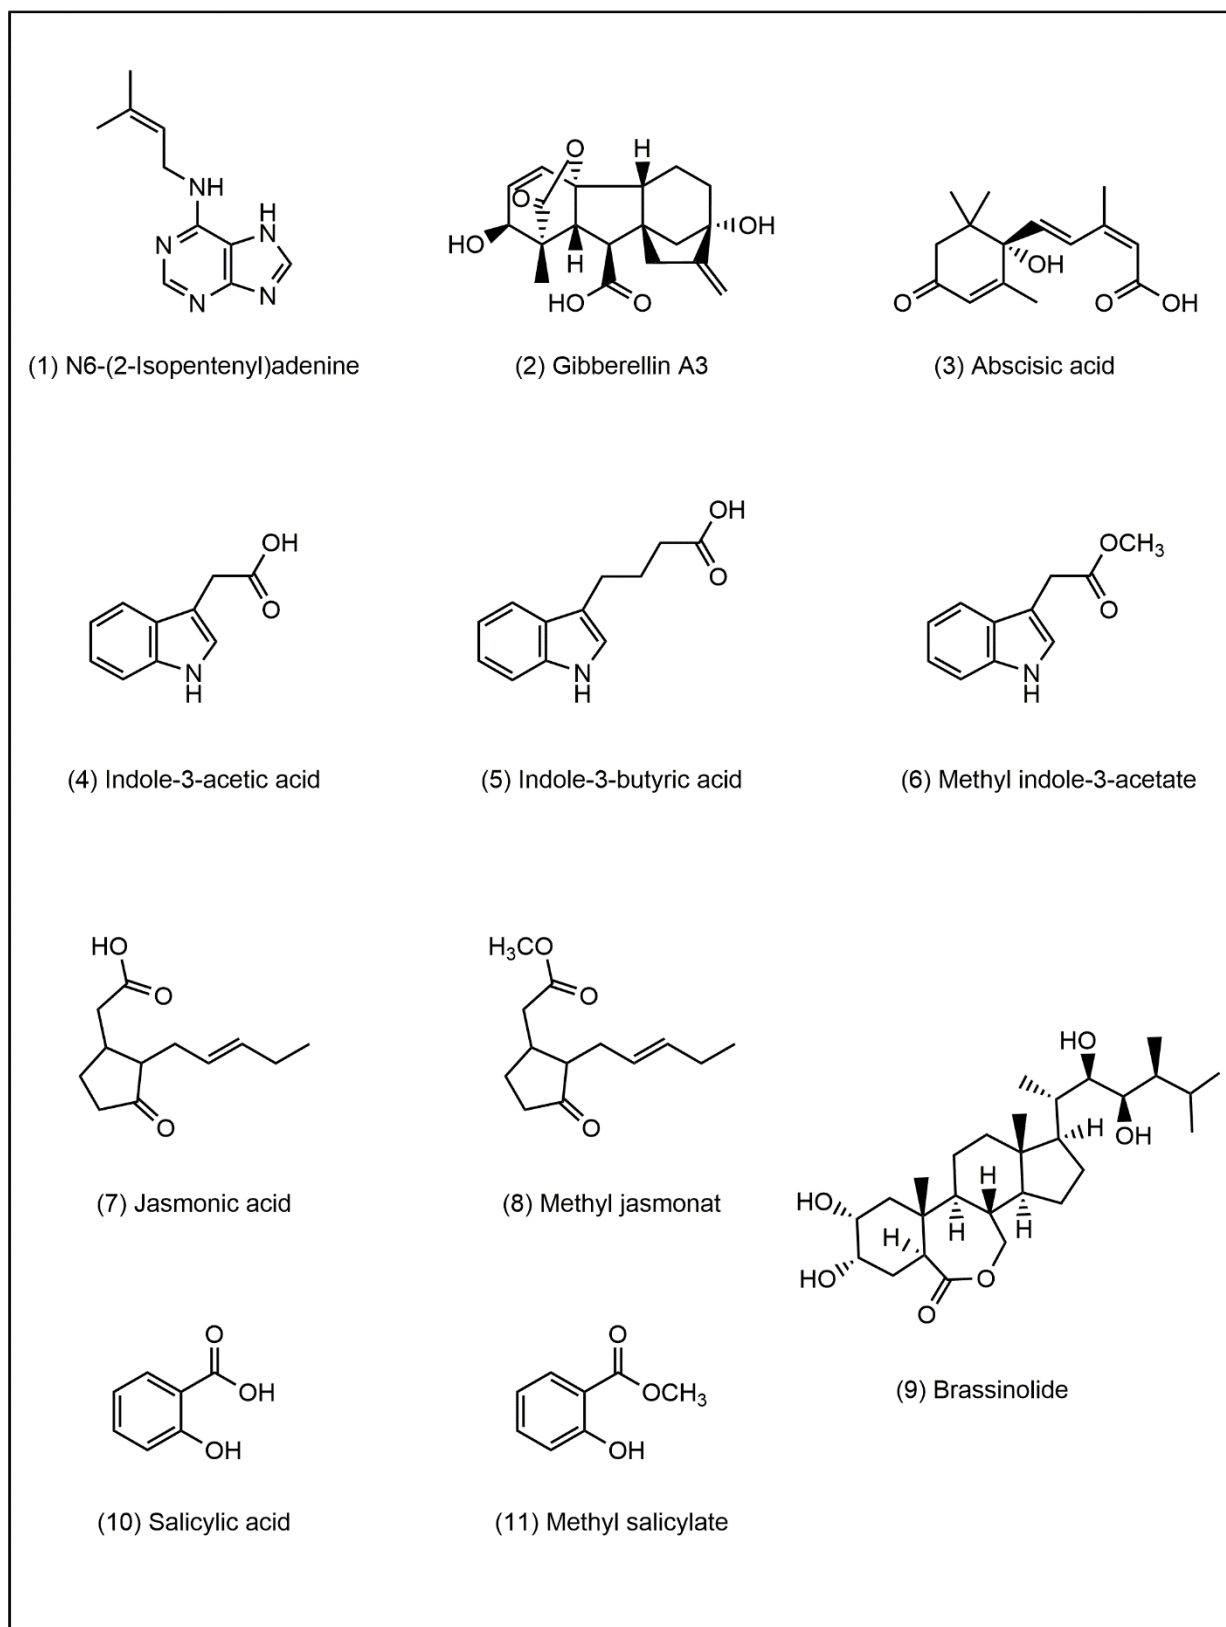

**Figure S1:** Chemical structures of IP, GA<sub>3</sub>, SA, JA, IAA, IBA, MeIAA, MeSA, MeJA and BL as representative Phytohormones.

**Table S1.** The MRM parameters of 5 anthocyanins.

| Analytes              | Transition | Fragmentor | College Energy | Polarity |
|-----------------------|------------|------------|----------------|----------|
| Cyanindin-glucoside   | 449>287    | 120        | 30             | Positive |
| Delphinidin-glucoside | 465>303    | 120        | 30             | Positive |
| Malvidin-glucoside    | 493>331    | 120        | 30             | Positive |
| Peonidin-glucoside    | 463>301    | 120        | 30             | Positive |
| Petunidin-glucoside   | 479>317    | 120        | 30             | Positive |

**Table S2.** The MRM parameters of non-anthocyanin phenolics.

| <b>Analytes</b>          | <b>Transition</b> | <b>Fragmentor</b> | <b>Collision Energy</b> | <b>Polarity</b> |
|--------------------------|-------------------|-------------------|-------------------------|-----------------|
| Procyanin B1             | 449>287           | 120               | 30                      | Negative        |
| Gallocatechin            | 465>303           | 120               | 30                      | Negative        |
| Catechin                 | 493>331           | 120               | 30                      | Negative        |
| epicatechin              | 463>301           | 120               | 30                      | Negative        |
| Procyanin C1             | 479>317           | 120               | 30                      | Negative        |
| Epigallocatechin gallate | 457>169           | 120               | 30                      | Negative        |
| Epicatechin gallate      | 441>289           | 120               | 30                      | Negative        |
| Chlorogenic acid         | 353>191           | 120               | 30                      | Negative        |
| Caffeic acid             | 179>135           | 120               | 30                      | Negative        |
| 4-Hydroxycinnamic acid   | 163>119           | 120               | 30                      | Negative        |
| Sinapic acid             | 223>149           | 120               | 30                      | Negative        |
| Ferulic acid             | 193>134           | 120               | 30                      | Negative        |
| Gallic acid              | 169>125           | 120               | 30                      | Negative        |
| Protocatechuic acid      | 153>109           | 120               | 30                      | Negative        |
| 4-Hydroxybenzoic acid    | 137>93            | 120               | 30                      | Negative        |
| Gentisic acid            | 153>109           | 120               | 30                      | Negative        |
| Syringic acid            | 197>182           | 120               | 30                      | Negative        |
| Vanillic acid            | 167>152           | 120               | 30                      | Negative        |
| Myricetin-glucoside      | 479>316           | 120               | 30                      | Negative        |
| Dihydroquercetin         | 303>125           | 120               | 30                      | Negative        |
| Quercetin-glucuronide    | 477>301           | 120               | 30                      | Negative        |
| Quercetin-glucoside      | 463>300           | 120               | 30                      | Negative        |
| Dihydrokaempferol        | 287>259           | 120               | 30                      | Negative        |
| Syringetin-glucoside     | 507>344           | 120               | 30                      | Negative        |
| Isorhamnetin-glucoside   | 477>314           | 120               | 30                      | Negative        |
| Quercetin-rhamnoside     | 447>300           | 120               | 30                      | Negative        |
| Kaempferol-glucoside     | 447>255           | 120               | 30                      | Negative        |
| Myricetin                | 317>151           | 120               | 30                      | Negative        |
| Syringetin               | 345>315           | 120               | 30                      | Negative        |
| Laricitrin               | 331>151           | 120               | 30                      | Negative        |
| Isorhamnetin             | 315>300           | 120               | 30                      | Negative        |
| Quercetin                | 301>151           | 120               | 30                      | Negative        |
| Dihydromyricetin         | 319>193           | 120               | 30                      | Negative        |

**Table S3.** Abundance of anthocyanins and non-anthocyanin phenolics in sample solution using different elution solution.

| Analytes               | Abundance                      |                                                                       |
|------------------------|--------------------------------|-----------------------------------------------------------------------|
|                        | Sample eluted by MeOH (0.1%FA) | Sample eluted by CH <sub>2</sub> Cl <sub>2</sub> (2.5% MeOH , 0.5%FA) |
| Cyanindin-glucoside    | 138930 ± 6183                  | nd                                                                    |
| Delphinidin-glucoside  | 3302613 ± 104219               | 3340 ± 1280                                                           |
| Malvidin-glucoside     | 21929916 ± 1475216             | 52835 ± 918                                                           |
| Peonidin-glucoside     | 5301160 ± 296145               | 11545 ± 2382                                                          |
| Petunidin-glucoside    | 3133707 ± 218087               | 4439 ± 2080                                                           |
| Procyanin B1           | 15753 ± 416                    | nd                                                                    |
| Gallocatechin          | 30743 ± 602                    | nd                                                                    |
| Catechin               | 18687 ± 177                    | nd                                                                    |
| epicatechin            | 3966 ± 83                      | nd                                                                    |
| Caffeic acid           | 2797 ± 197                     | nd                                                                    |
| Gallic acid            | 5635 ± 169                     | 281 ± 63                                                              |
| Protocatechuic acid    | 10180 ± 344                    | 1897 ± 273                                                            |
| Myricetin-glucoside    | 621727 ± 20892                 | 1190 ± 730                                                            |
| Quercetin-glucuronide  | 245383 ± 7221                  | 434 ± 246                                                             |
| Quercetin-glucoside    | 325262 ± 772                   | 2562 ± 1938                                                           |
| Syringetin-glucoside   | 54013 ± 1238                   | 6910 ± 3881                                                           |
| Isorhamnetin-glucoside | 82956 ± 2927                   | 11134 ± 6716                                                          |
| Quercetin-rhamnoside   | 6529 ± 159                     | 260 ± 192                                                             |
| Kaempferol-glucoside   | 74814 ± 1177                   | 1777 ± 1546                                                           |
| Myricetin              | 10107 ± 738                    | 162 ± 75                                                              |
| Syringetin             | 14612 ± 1122                   | 18319 ± 3529                                                          |
| Isorhamnetin           | 3187 ± 200                     | 1749 ± 289                                                            |
| Quercetin              | 2440 ± 48                      | nd                                                                    |
| Dihydromyricetin       | 1040 ± 22                      | nd                                                                    |

**Table S4.** The dMRM parameters of 11 hormones and internal standard.

| Analytes        | Transition   | Fragmentor | College Energy | Retention Time (min) | Delta Retention Time (min) | Polarity |
|-----------------|--------------|------------|----------------|----------------------|----------------------------|----------|
| IP              | 204.13>136   | 99         | 16             | 2.4                  | 0.6                        | Positive |
| GA <sub>3</sub> | 345.1>239.1  | 162        | 12             | 3.37                 | 0.5                        | Negative |
| SA              | 137>93       | 89         | 20             | 4.2                  | 0.5                        | Negative |
| IAA             | 176.07>130   | 99         | 16             | 4.38                 | 0.5                        | Positive |
| ABA             | 263.1>153    | 104        | 8              | 5.35                 | 0.6                        | Negative |
| JA              | 209.12>59.1  | 118        | 12             | 6.48                 | 0.5                        | Negative |
| IBA             | 204.1>186    | 94         | 12             | 6.61                 | 0.4                        | Positive |
| MeIAA           | 190.1>130    | 84         | 24             | 6.94                 | 0.5                        | Positive |
| MeSA            | 153.1>121    | 65         | 16             | 7.74                 | 0.7                        | Positive |
| MeJA            | 225.15>151   | 95         | 12             | 9.46                 | 0.7                        | Positive |
| BL              | 481.36>445.4 | 133        | 12             | 9.64                 | 0.5                        | Positive |
| TPP             | 327>215      | 170        | 30             | 12.67                | 0.4                        | Positive |

**Table S5.** Linearity, LODs and LOQs of IAA and IBA in dMRM mode.

| Analytes | Equation of linear regression | R <sup>2</sup> | Linear range (ng/ml) | LOD (ng/ml) | LOQ (ng/ml) |
|----------|-------------------------------|----------------|----------------------|-------------|-------------|
| IAA      | y=24.23x-0.0028               | 0.9998         | 0.5-250              | 0.16        | 0.5         |
| IBA      | y=18.44x+0.3598               | 0.9983         | 0.5-100              | 0.16        | 0.5         |
